# Supplementary material for: Chimeric RNA Design Principles for RNA-Mediated Gene Fusion
Source: MDPI journal article supplement (doi:10.3390/cells11061002), 2022-03-16
Supplement: s1 [file s1]

---

## Supplementary Information

# Chimeric RNA design principles for RNA-mediated gene fusion

Sachin Kumar Gupta and Laising Yen\*

<sup>1</sup> Department of Pathology & Immunology, Baylor College of Medicine, Houston, TX 77030, USA; sachinkumar.gupta@bcm.edu

<sup>2</sup> Department of Molecular & Cellular Biology, Baylor College of Medicine, Houston, TX 77030, USA

<sup>3</sup> Dan L. Duncan Cancer Center, Baylor College of Medicine, Houston, TX 77030, USA

\* Correspondence: author: yen@bcm.edu; Tel.: +1-713-798-1180

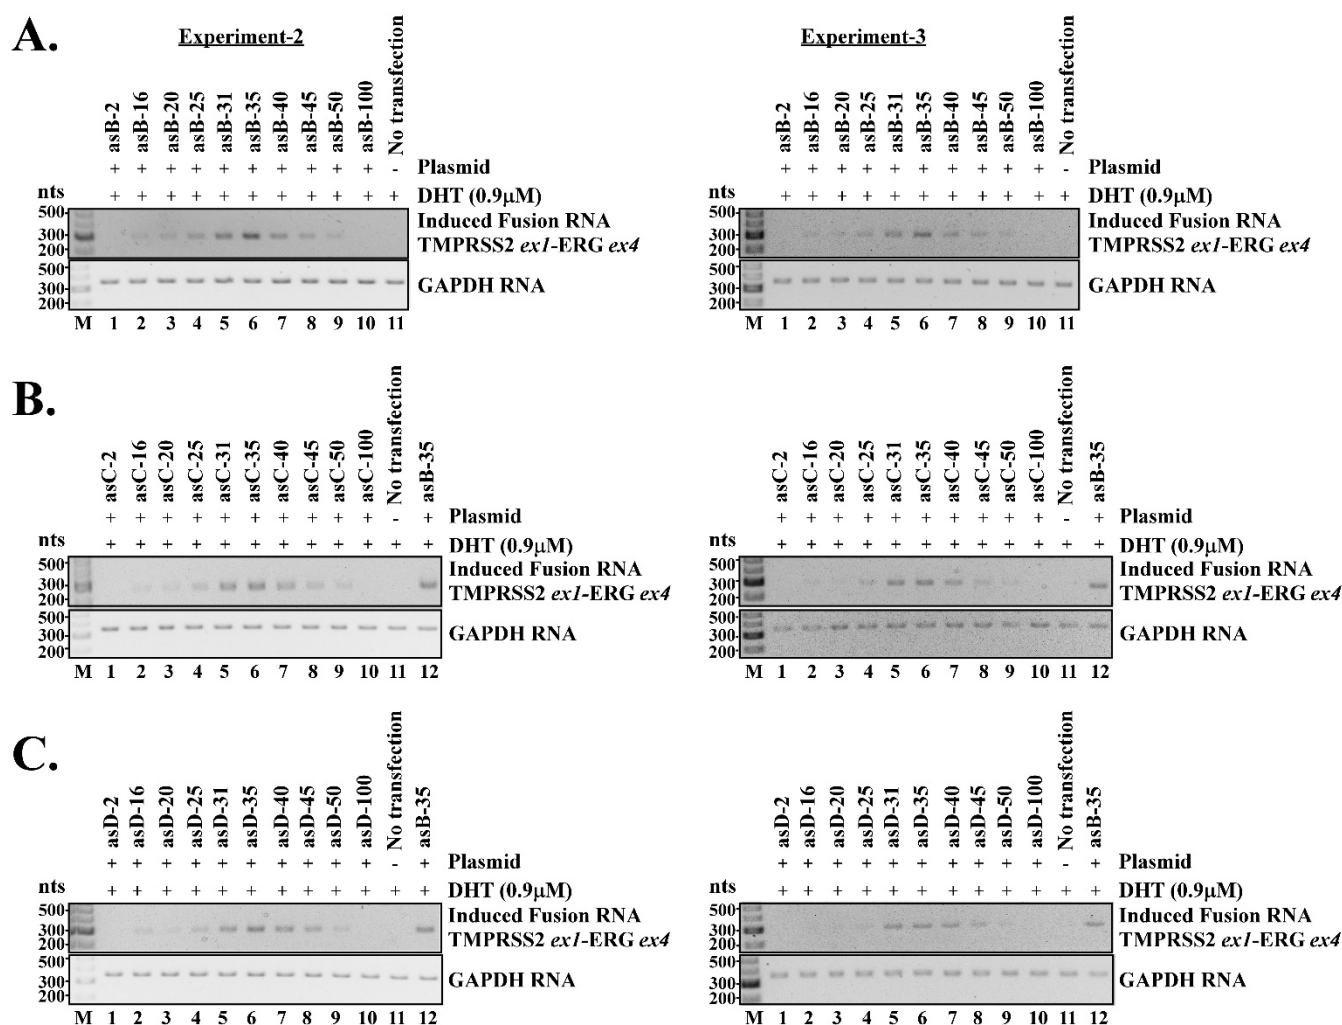

### Supplementary Figure S1. The bulge size regulates the efficiency of RNA-mediated gene fusion.

The RT-PCR gels shown in Figure 1 in the main text were obtained from a single experiment. Here we show the RT-PCR gels from additional two independent experiments. **A.** RT-PCT results of induced TMPRSS2-ERG transcripts by chimeric RNAs designed to target location B. **B.** RT-PCT results by chimeric RNAs designed to target location C. **C.** RT-PCT results by chimeric RNAs designed to target location D. GAPDH RNA was used as loading control. No transfection was used as the negative control for RT-PCR reactions. Left panel: Experiment-2, Right panel: Experiment-3.

| <b>A.</b> | Tm (°C) for targeting TMPRSS2 genomic region | Tm (°C) for targeting ERG genomic region |
|-----------|----------------------------------------------|------------------------------------------|
| asB-2     | 85                                           | 75                                       |
| asB-16    | 86                                           | 74                                       |
| asB-20    | 87                                           | 73                                       |
| asB-25    | 88                                           | 73                                       |
| asB-31    | 88                                           | 74                                       |
| asB-35    | 86                                           | 75                                       |
| asB-40    | 87                                           | 76                                       |
| asB-45    | 87                                           | 76                                       |
| asB-50    | 87                                           | 76                                       |
| asB-100   | 79                                           | 75                                       |

| <b>B.</b> | Tm (°C) for targeting TMPRSS2 genomic region | Tm (°C) for targeting ERG genomic region |
|-----------|----------------------------------------------|------------------------------------------|
| asC-2     | 81                                           | 73                                       |
| asC-16    | 83                                           | 75                                       |
| asC-20    | 84                                           | 74                                       |
| asC-25    | 84                                           | 73                                       |
| asC-31    | 83                                           | 73                                       |
| asC-35    | 83                                           | 74                                       |
| asC-40    | 84                                           | 75                                       |
| asC-45    | 82                                           | 73                                       |
| asC-50    | 80                                           | 74                                       |
| asC-100   | 78                                           | 75                                       |

| <b>C.</b> | Tm (°C) for targeting TMPRSS2 genomic region | Tm (°C) for targeting ERG genomic region |
|-----------|----------------------------------------------|------------------------------------------|
| asD-2     | 88                                           | 72                                       |
| asD-16    | 86                                           | 72                                       |
| asD-20    | 87                                           | 74                                       |
| asD-25    | 86                                           | 74                                       |
| asD-31    | 85                                           | 73                                       |
| asD-35    | 85                                           | 73                                       |
| asD-40    | 83                                           | 72                                       |
| asD-45    | 82                                           | 73                                       |
| asD-50    | 84                                           | 72                                       |
| asD-100   | 86                                           | 75                                       |

**Supplementary Figure S2. The melting temperature (Tm) of chimeric RNA designed to create different bulge sizes.** Tm was calculated using formula:  $Tm = 64.9 + 41 * (nG + nC - 16.4) / (nA + nT + nG + nC)$  where “n” stands for total number of particular nucleotide. The Tm calculation can be found at this link: <http://insilico.ehu.es/tm.php?formula=basic>.

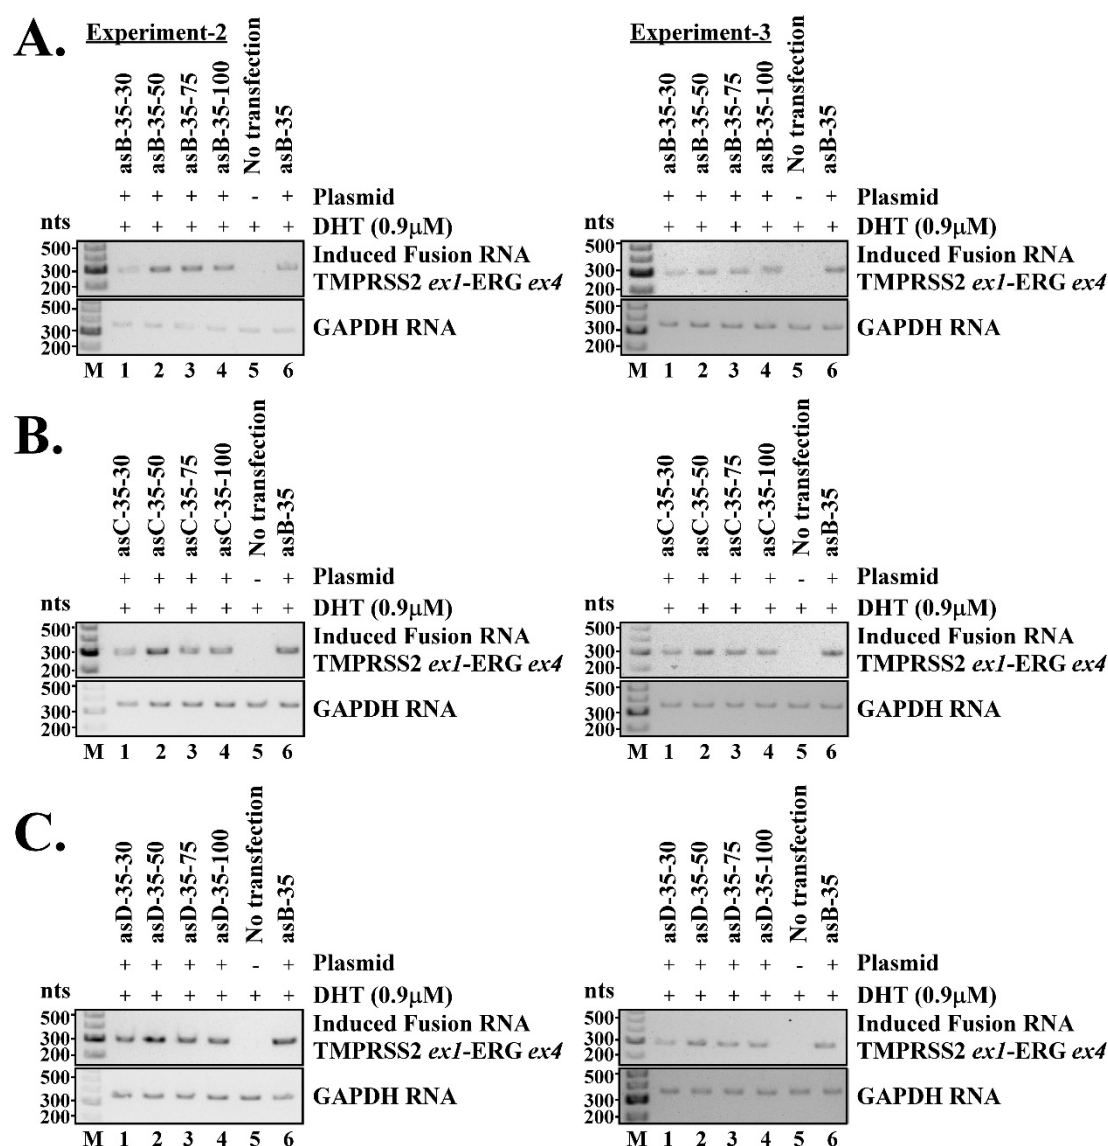

The RT-PCR gels shown in Figure 2 in the main text were obtained from a single experiment. Here we show the RT-PCR gels from additional two independent experiments. **A.** RT-PCT results of induced TMPRSS2-ERG transcripts by chimeric RNAs designed to target location B. **B.** RT-PCT results by chimeric RNAs designed to target location C. **C.** RT-PCT results by chimeric RNAs designed to target location D. GAPDH RNA was used as loading control. No transfection was used as the negative control for RT-PCR reactions. Left panel: Experiment-2, Right panel: Experiment-3.

| <b>A.</b>      |                                                    |                                                | <b>B.</b>      |                                                    |                                                | <b>C.</b>      |                                                    |                                                |
|----------------|----------------------------------------------------|------------------------------------------------|----------------|----------------------------------------------------|------------------------------------------------|----------------|----------------------------------------------------|------------------------------------------------|
|                | Tm (°C) for<br>targeting TMPRSS2<br>genomic region | Tm (°C) for<br>targeting ERG<br>genomic region |                | Tm (°C) for<br>targeting TMPRSS2<br>genomic region | Tm (°C) for<br>targeting ERG<br>genomic region |                | Tm (°C) for<br>targeting TMPRSS2<br>genomic region | Tm (°C) for<br>targeting ERG<br>genomic region |
| asB-35-30/30   | 77                                                 | 65                                             | asC-35-30/30   | 79                                                 | 63                                             | asD-35-30/30   | 75                                                 | 61                                             |
| asB-35-50/50   | 86                                                 | 69                                             | asC-35-50/50   | 83                                                 | 72                                             | asD-35-50/50   | 84                                                 | 69                                             |
| asB-35-75/75   | 88                                                 | 75                                             | asC-35-75/75   | 85                                                 | 74                                             | asD-35-75/75   | 88                                                 | 73                                             |
| asB-35-100/100 | 91                                                 | 77                                             | asC-35-100/100 | 86                                                 | 76                                             | asD-35-100/100 | 91                                                 | 75                                             |

**Supplementary Figure S4. The melting temperature (Tm) of chimeric RNA with different target lengths.** Tm was calculated using formula:  $Tm = 64.9 + 41 * (nG + nC - 16.4) / (nA + nT + nG + nC)$  where “n” stands for total number of particular nucleotide. The Tm calculation can be found at this link: <http://insilico.ehu.es/tm.php?formula=basic>.

Location B:

## TMPRSS2

■: targeted TMPRSS2 sequence, ■: bulge, ■: stem

## ERG

■: targeted ERG sequence, ■: bulge, ■: stem

## TMPR.SS2

■: targeted TMPRSS2 sequence, ■: bulge, ■: stem ■

## ERG

■: targeted ERG sequence, ■: bulge, ■: stem ■

## TMPRSS2

■: targeted TMPRSS2 sequence, ■: bulge, ■: stem

ERG

Ccctcccagctcacgaggggtggccccacttctatgcttttccttgcagtttctccatctggaaatgctccccaccattttgattt  
 acccagtaacccccattcttcaaggctcaggccagtgacaccagttcctttaatccctccttccttcttctgtcatccagtcgaca  
 cacttagcatga

■: targeted ERG sequence, ■: bulge, ■: stem

B-25

TMPRSS2

Tgagattaaagcgagagccagggcgggccgggcccagtaggcgcgagctaagcaggaggcgaggcgaggcggaagggcgaggggagc  
 gggagcgccgcctggagcgccgcaggtgagcggcgccgggtaccaggggtcccggctcggggtccgggctggggagggg

■: targeted TMPRSS2 sequence, ■: bulge, ■: stem

ERG

Ccctcccagctcacgaggggtggccccacttctatgcttttccttgcagtttctccatctggaaatgctccccaccattttgattt  
 acccagtaacccccattcttcaaggctcaggccagtgacaccagttcctttaatccctccttccttcttctgtcatccagtcgaca  
 cacttagcatga

■: targeted ERG sequence, ■: bulge, ■: stem

B-31

TMPRSS2

Tgagattaaagcgagagccagggcgggccgggcccagtaggcgcgagctaagcaggaggcgaggcgaggcggaagggcgaggggaggggagc  
 gggagcgccgcctggagcgccgcaggtgagcggcgccgggtaccaggggtcccggctcggggtccgggctggggagggg

■: targeted TMPRSS2 sequence, ■: bulge, ■: stem

ERG

Ccctcccagctcacgaggggtggccccacttctatgcttttccttgcagtttctccatctggaaatgctccccaccattttgattt  
 acccagtaacccccattcttcaaggctcaggccagtgacaccagttcctttaatccctccttccttcttctgtcatccagtcgaca  
 cacttagcatga

■: targeted ERG sequence, ■: bulge, ■: stem

■: targeted TMPRSS2 sequence, ■: bulge, ■: stem



ERG

Ccctccccagc t c a c g a g g g t g g c c c c a c t t c t a t g c t t t t c c t t g c a g t t t t c t c a t c t g g a a a t g t c c c c a c c a t t t t g a t t t  
a c c c a g t a c a c c c a t t c t t c a a g g c t c a g g c a g t g c a c a c c a g t t c c t t t a a t c c c t c c t t c c t t c t t g t c a t c c a g t c g a c a  
c a c t t a g c a t g a

■: targeted ERG sequence, ■: bulge, ■: stem

B-50

TMPRSS2

[illegible]

■: targeted TMPRSS2 sequence, ■: bulge, ■: stem

ERG

Ccctccccagcctcacgaggggtggccccacttctatgcttttcccttgagtttctccatctggaaatgctccccaccattttgattt  
accagtacccccattcttcaaggctcaggccagtgcacaccagttctttaatccctccttccttcttctgtcatccagtcgaca  
cacttagcatga

■: targeted ERG sequence, ■: bulge, ■: stem

**B-100**

TMPRSS2

Tgagattaaagcgagagccagggcgggcccgggagtaggcgcgagctaagcaggaggcggaggcggaggcggaggcgcaggggcccggagcgccgccttgagcgcgccaggtgagcggcgccggtaccagggctccgggctcgggggtccgggctgggggaggg

■: targeted TMPRSS2 sequence, ■: bulge, ■: stem ■

ERG

Ccctccccagc t c a c g a g g g t g g c c c c a c t t c t a t g c t t t t c c t t g c a g t t t c t c c a t c t g g a a t g c t c c c c a c c a t t t t g a t t t  
a c c c a g t a c a c c c a t t c t t c a a g g c t c a g g c a g t g c a c a c c a g t t c c t t a a t c c c t c c t t c c t t c t t g t c a t c c a g t c g a c a  
c a c t t a g c a t g a

■: targeted ERG sequence, ■: bulge, ■: stem, ■: 3' UTR

**Location C:****C-2**

## TMPRSS2

Catcgcgaggttggggcaggtggtcctgcgagtccttagccagttggtggaagagagtagccccggggtccccaagctggctcctag  
tccgcctgccctccacggccccgcctgggagcaccgggtgcgccttttctctttggggaggaggaactgggagtgctg

: targeted TMPRSS2 sequence, : bulge, : stem 

## ERG

Cagcactcccagagtcataaaaaatcaagtctcactggcaaccaacttgtagtgcataaaaagtgttaccaggacggggtctacca  
gtgctcatctatgtcataggaagcatgagctcagcgtataacattagcaaagggtctgatgacctggctacttagtcccccttc  
catgcagcaacca

: targeted ERG sequence, : bulge, : stem 

**C-16**

## TMPRSS2

Catcgcgaggttggggcaggtggtcctgcgagtccttagccagttggtggaagagagtagccccggggtccccaagctggctccctag  
tccgcctgccctccacggccccgcctgggagcaccgggtgcgccttttctctttggggaggaggaactgggagtgctg

: targeted TMPRSS2 sequence, : bulge, : stem 

## ERG

Cagcactcccagagtcataaaaaatcaagtctcactggcaaccaacttgtagtgcataaaaagtgttaccaggacggggtctacca  
gtgctcatctatgtcataggaagcatgagctcagcgtataacattagcaaagggtctgatgacctggctacttagtcccccttc  
catgcagcaacca

: targeted ERG sequence, : bulge, : stem 

**C-20**

## TMPRSS2

Catcgcgaggttggggcaggtggtcctgcgagtccttagccagttggtggaagagagtagccccggggtccccaagctggctcctag  
tccgcctgccctccacggccccgcctgggagcaccgggtgcgccttttctctttggggaggaggaactgggagtgctg

: targeted TMPRSS2 sequence, : bulge, : stem 

ERG

Cagcactcccagagtcataaaaatcaagtctcactggcaaccaacttggttagtgcatgaaaagtgttaccaggacggggtctaccca  
gtgctcatctatgtcataggaaaagcatgagctcagcgtataacattagcaaagggctctgatgacctggctacttagtcccctttc  
catgcagcaacca

: targeted ERG sequence, : bulge, : stem 

C-25

TMPRSS2

Catcgcgaggttggggcaggtggtcctgcgagtcacctagccagttggtggaagagagatcccccggggtcccaaa  
tccgctgcctccacggcccccgctgggagcaccggtgcgccttttctctttggggaggaggactgggagtgctg

: targeted TMPRSS2 sequence, : bulge, : stem 

ERG

Cagcactcccagagtcataaaaatcaagtctcactggcaaccaacttggttagtgcatgaaaagtgttaccaggacggggtctaccca  
gtgctcatctatgtcataggaaaagcatgagctcagcgtataacattagcaaagggctctgatgacctggctacttagtcccctttc  
catgcagcaacca

: targeted ERG sequence, : bulge, : stem 

C-31

TMPRSS2

Catcgcgaggttggggcaggtggtcctgcgagtcacctagccagttggtggaagagagatcccccggggtc  
tccgctgcctccacggcccccgctgggagcaccggtgcgccttttctctttggggaggaggactgggagtgctg

: targeted TMPRSS2 sequence, : bulge, : stem 

ERG

Cagcactcccagagtcataaaaatcaagtctcactggcaaccaacttggttagtgcatgaaaagtgttaccaggacggggtctaccca  
gtgctcatctatgtcataggaaaagcatgagctcagcgtataacattagcaaagggctctgatgacctggctacttagtcccctttc  
catgcagcaacca

: targeted ERG sequence, : bulge, : stem 

## C-35

## TMPRSS2

Catcgcgaggttggggcaggtgggtcctgcgagtccttagccagttggtggaagagagtccccggggtccccaaagctggctcctag  
tccgcctgccctccacggcccccgctgggagcaccgggtgcgccttttctctttggggaggaggactgggagtgctg

: targeted TMPRSS2 sequence, : bulge, : stem 

## ERG

Cagcactcccagagtcataaaaatcaagtctcactggcaaccaacttggttagtgcatagaaaagtgttaccaggacggggtctaccca  
gtgctcatctatgtcatagggaaaagcatgagctcagcgataacattagcaaagggtctgatgacctggctacttagtcccccttc  
catgcagcaacca

: targeted ERG sequence, : bulge, : stem 

## C-40

## TMPRSS2

Catcgcgaggttggggcaggtgggtcctgcgagtccttagccagttggtggaagagagtccccgggggtccccaaagctggctcctag  
tccgcctgccctccacggcccccgctgggagcaccgggtgcgccttttctctttggggaggaggactgggagtgctg

: targeted TMPRSS2 sequence, : bulge, : stem 

## ERG

Cagcactcccagagtcataaaaatcaagtctcactggcaaccaacttggttagtgcatagaaaagtgttaccaggacggggtctaccca  
gtgctcatctatgtcatagggaaaagcatgagctcagcgataaacattagcaaagggtctgatgacctggctacttagtcccccttc  
catgcagcaacca

: targeted ERG sequence, : bulge, : stem 

## C-45

## TMPRSS2

Catcgcgaggttggggcaggtgggtcctgcgagtccttagccagttggtggaagagagtcccccgggggtccccaaagctggctcctag  
tccgcctgccctccacggcccccgctgggagcaccgggtgcgccttttctctttggggaggaggactgggagtgctg

: targeted TMPRSS2 sequence, : bulge, : stem 

ERG

Cagcactcccagagtcataaaaatcaagtctcactggcaaccaacttgtagtgcataaaaagtgttaccaggacggggtctaccca  
 gtgctcatctatgtcatagggaaaagcatgagctcagcgtataacaattagcaaagggctctgatgacctggctacttagtcccccttc  
 catgcagcaacca

■: targeted ERG sequence, ■: bulge, ■: stem ■

C-50

TMPRSS2

Catcgcgagggtggggcaggtgggtcctgcgagtccttagccagttggtagagagagtcccccggggtccccaaagctgggtcctag  
 tccgctgcctccacggcccccgctgggagcaccgggtgcgccttttctctttggggaggaggaatgggagtgctg

■: targeted TMPRSS2 sequence, ■: bulge, ■: stem ■

ERG

Cagcactcccagagtcataaaaatcaagtctcactggcaaccaacttgtagtgcataaaaagtgttaccaggacggggtctaccca  
 gtgctcatctatgtcatagggaaaagcatgagctcagcgtataaacattagcaaaagggctctgatgacctggctacttagtcccccttc  
 catgcagcaacca

■: targeted ERG sequence, ■: bulge, ■: stem ■

C-100

TMPRSS2

Catcgcgagggtggggcaggtgggtcctgcgagtccttagccagttggtagagagagtcccccggggtccccaaagctgggtcctag  
 tccgctgcctccacggcccccgctgggagcaccgggtgcgccttttctctttggggaggaggaatgggagtgctg

■: targeted TMPRSS2 sequence, ■: bulge, ■: stem ■

ERG

Cagcactcccagagtcataaaaatcaagtctcactggcaaccaacttgtagtgcataaaaagtgttaccaggacggggtctaccca  
 gtgctcatctatgtcatagggaaaagcatgagctcagcgtataaacattagcaaaagggctctgatgacctggctacttagtcccccttc  
 catgcagcaacca

■: targeted ERG sequence, ■: bulge, ■: stem ■

**Location D:****D-2**

TMPRSS2

Gctggggaggggaacctggggcgctgggacccgccgatgccccctgccccgccggaggtgaaagcgggtgtgaggagcgcgcg  
gcaggtgagtgcgccccaggggtcgagcgctggggccagccgggcagggcgctcccgggggtgctgggagagtgcctggg

■: targeted TMPRSS2 sequence, ■: bulge, ■: stem

ERG

Cccagcactctccgtttaccatccagatcctttattccatccagatccagggtctggacacttatcccttcacatctttcttctgt  
ctcttccctctaccagcctctctctctctgtctctctctaggtgattccatctctcatggcaagagcaggcaccaaaacactccacc  
gtgtgacttttctt

■: targeted ERG sequence, ■: bulge, ■: stem

**D-16**

TMPRSS2

Gctggggaggggaacctggggcgctgggacccgccgatgccccctgccccgccggaggtgaaagcgggtgtgaggagcgcgcg  
gcaggtgagtgcgccccaggggtcgagcgctggggccagccgggcagggcgctcccgggggtgctgggagagtgcctggg

■: targeted TMPRSS2 sequence, ■: bulge, ■: stem

ERG

Cccagcactctccgtttaccatccagatcctttattccatccagatccagggtctggacacttatcccttcacatctttcttctgt  
ctcttccctctaccagcctctctctctctgtctctctctaggtgattccatctctcatggcaagagcaggcaccaaaacactccacc  
gtgtgacttttctt

■: targeted ERG sequence, ■: bulge, ■: stem

**D-20**

TMPRSS2

■: targeted TMPRSS2 sequence, ■: bulge, ■: stem ■

■: targeted ERG sequence, ■: bulge, ■: stem ■

## D-25

■: targeted TMPRSS2 sequence, ■: bulge, ■: stem ■

■: targeted ERG sequence, ■: bulge, ■: stem, ■

D-31

■: targeted TMPRSS2 sequence, ■: bulge, ■: stem ■

ERG

Cccagcactctccggtttaccatccagatcctttattccatcccagatccagggttctggacacttatcccttcattctttcttctgtctcttccctctaccagcctctctctctctgtctctctctaggtgattccatctctcatggcaagagcaggcaccaaaacactccaccgtgtgacttttctt

■: targeted ERG sequence, ■: bulge, ■: stem ■

## D-35

### TPRSS2

Gctggggaggggaacctgggagcctgggacccgccgatgccccctgccccgcccggaggtgaaagcgggtgtgaggagcgcgggcgcggcaggtgagtgcgccccgagggtcgagcgctggggccagccgggcagggcgccctcccggggtgctgggagagtgtctggg

■: targeted TPRS2 sequence, ■: bulge, ■: stem ■

### ERG

Cccagcactctccggtttaccatccagatcctttattccatcccagatccagggttctggacacttatcccttcattctttcttctgtctcttccctctaccagcctctctctctctgtctctctctaggtgattccatctctcatggcaagagcaggcaccaaaacactccaccgtgtgacttttctt

■: targeted ERG sequence, ■: bulge, ■: stem ■

## D-40

### TPRSS2

Gctggggaggggaacctgggagcctgggacccgccgatgccccctgccccgcccggaggtgaaagcgggtgtgaggagcgcgggcgcggcaggtgagtgcgccccgagggtcgagcgctggggccagccgggcagggcgccctcccggggtgctgggagagtgtctggg

■: targeted TPRS2 sequence, ■: bulge, ■: stem ■

### ERG

Cccagcactctccggtttaccatccagatcctttattccatcccagatccagggtattctggacacttatcccttcattctttcttctgtctcttccctctaccagcctctctctctctgtctctctctaggtgattccatctctcatggcaagagcaggcaccaaaacactccaccgtgtgacttttctt

■: targeted ERG sequence, ■: bulge, ■: stem ■



## D-45

TMPRSS2

Gctggggaggggaacctggg'gcctggg'acccgccgatgccccctgccccgcgcg'gaggtgaaagcgggtgtgaggagcgcggcgcg'gaggtgagtgcgcccaggg'gtcgagcgcctggggccagccgggcagggcgcctcccggggtgctg'ggagagtgcctggg'

■: targeted TMPRSS2 sequence, ■: bulge, ■: stem

ERG

Cccagcactctcc'gtttaccatccagatcctttattccatcccagatccaggattct'ggacacttatcccttcattctttcttctgt'ctcttccctctaccagcctctctctctctgtctctctctaggtgat'tccatctctcatggcaagagcaggcaccaaaacactccacc'gtgtgacttttctt'

■: targeted ERG sequence, ■: bulge, ■: stem

## D-50

TMPRSS2

Gctggggaggggaacctggg'gcctggg'acccgccgatgccccctgccccgcgcg'cccggaggtgaaagcgggtgtgaggagcgcggcgcg'gaggtgagtgcgccc'cgagggtcgagcgcctggggccagccgggcagggcgcctcccggggtgctg'ggagagtgcctggg'

■: targeted TMPRSS2 sequence, ■: bulge, ■: stem

ERG

Cccagcactctcc'gtttaccatccagatcctttattccatcccagatccaggattctggaca'cttatcccttcattctttcttctgt'ctcttccctctaccagcctctctctctctgtctctctctaggtgattccat'ctctcatggcaagagcaggcaccaaaacactccacc'gtgtgacttttctt'

■: targeted ERG sequence, ■: bulge, ■: stem

## D-100

TMPRSS2

Gctggggaggggaacctggg'gcctggg'acccgccgatgccccctgccccgcgcg'ccggaggtgaaagcgggtgtgaggagcgcggcgcg'gaggtgagtgcgcccaggggtcgagcgcctggggccagccgggcagggcgcctcccggggtgctg'ggagagtgcctggg'

■: targeted TMPRSS2 sequence, ■: bulge, ■: stem ■

ERG

Cccagcactctccgtttaccatccagatcctttattccatcccagatccagggattctggacacttatcccttcacatctttcttctgt  
ctcttccctctaccagcctctctctctctctgtgtctctctctaggtgattccatctctcatggcaagagcaggcaccaaaacactccacc  
gtgtgactttttctt

■: targeted ERG sequence, ■: bulge, ■: stem ■

## Supplementary file S2: Chimeric RNA sequences

asB-2

+1gtgctcgcttcggcagcacatataactaacattggaacgatcctgcagTAAATCAAAATGGTGGGAGCATGTCCAGATGGAGAAA  
CTGCAAGGAAAAGCATAGAAGTGGGGCCACCCCTCGTGGACCCCGAGCCGGGACCCCTGGTACCGGCGCCGCTCACCTGCCGCGCTCC  
AG

 : *TMPRSS2*,  : *ERG*, +1: Transcription start, ctgcag: PstI

#### asB-16

+1gtgctcgcttcggcagcacatataactaacattggaacgatcctgcagTGGGGTGTACTGGGTAAATCAAAATGGTGGGGAGCATT  
TCCAGATGGAGAACTGCAAGGAAAAGCATAGAAGTGGACCCCTGGTACCGGCGCCGCTCACCTGCCGCGCTCCAGGCGGCGCTCCCC  
GC

 : *TMPRSS2*,  : *ERG*, +1: Transcription start, ctgcag: PstI

#### asB-20

+1gtgctcgcttcggcagcacatataactaacattggaacgatcctgcagAGAATGGGGTGTACTGGGTAAATCAAAATGGTGGGG  
AGCATTTCAGATGGAGAACTGCAAGGAAAAGCATAGACTGGTACCGGCGCCGCTCACCTGCCGCGCTCCAGGCGGCGCTCC  
CCGCCCCCT

 : *TMPRSS2*,  : *ERG*, +1: Transcription start, ctgcag: PstI

#### asB-25

+1gtgctcgcttcggcagcacatataactaacattggaacgatcctgcagCTTGAAGAATGGGGTGTACTGGGTAAATCAAAATGGTG  
GGGAGCATTTCAGATGGAGAACTGCAAGGAAAAGCACCGGCGCCGCTCACCTGCCGCGCTCCAGGCGGCGCTCCCCGCCCTCGC  
CC

 : *TMPRSS2*,  : *ERG*, +1: Transcription start, ctgcag: PstI

#### asB-31

+1gtgctcgcttcggcagcacatataactaacattggaacgatcctgcagCTGAGCCTTGAAGAATGGGGTGTACTGGGTAAATCA  
AAATGGTGGGGAGCATTTCAGATGGAGAACTGCAAGGCGCGCTCACCTGCCGCGCTCCAGGCGGCGCTCCCCGCCCTCGC  
CCTCCGCC

 : *TMPRSS2*,  : *ERG*, +1: Transcription start, ctgcag: PstI

## asB-35

+1gtgctcgcttcggcagcacatataactaacattggaacgatcctgcagTGGCCTGAGCCTTGAAGAATGGGGTGTACTGGGTAA  
ATCAAAATGGTGGGGAGCATTTCAGATGGAGAACTGCCTCAGCTGCGCGCTCCAGCGCGGCTCGCGCGCTCGCGCTG  
CGCCTCCG

: TMPRSS2, : ERG, +1: Transcription start, ctgcag: PstI

## asB-40

+1gtgctcgcttcggcagcacatataactaacattggaacgatcctgcagTGCACTGGCCTGAGCCTTGAAGAATGGGGTGTACTGGG  
TAAATCAAAATGGTGGGGAGCATTTCAGATGGAGAACTGCCGCGCTCCAGGCGGCGCTCCCCGCCCTCGCCCTCCGCCTCCGCCT  
CC

: TMPRSS2, : ERG, +1: Transcription start, ctgcag: PstI

## asB-45

+1gtgctcgcttcggcagcacatataactaacattggaacgatcctgcagTGGTGTGCACTGGCCTGAGCCTTGAAGAATGGGGTGT  
CTGGGTAAATCAAAATGGTGGGGAGCATTTCAGATGGCGCTCCAGGCGGCGCTCCCCGCCCTCGCCCTCCGCCTCCGCCTCCGCC  
TC

: TMPRSS2, : ERG, +1: Transcription start, ctgcag: PstI

## asB-50

+1gtgctcgcttcggcagcacatataactaacattggaacgatcctgcagGGAAC TGGTGTGCACTGGCCTGAGCCTTGAAGAATGGG  
GTGTACTGGGTAAATCAAAATGGTGGGGAGCATTTCCTCAGGCGGCGCTCCCCGCCCTCGCCCTCCGCCTCCGCCTCCGCCTCCTG  
CT

: TMPRSS2, : ERG, +1: Transcription start, ctgcag: PstI

## asB-100

+1gtgctcgcttcggcagcacatataactaacattggaacgatcctgcagTCATGCTAAGTGTGTCGACTGGATGACAGAAGAAGGAA  
GGAGGGATTAAAGGAACTGGTGTGCACTGGCCTGAGCCTTAGCTCGCGCCTACTCGGCCCGGCCCGCCCTGGCTCTCGCTTTAATCT  
CA

: *TMPRSS2*, : *ERG*, +1: Transcription start, ctgcag: PstI

## asC-2

+1gtgctcgcttcggcagcacatataactaacattggaacgatcctgcagACTGGGTAGACCCCGTCCTGGTAACACTTCTCATGCAC  
TAACAAGTTGGTTGCCAGTGAGACTTGATTCTTATGACTCCTCCCCAAAGAGAAAAGGCGCACCCGGTGCTCCCAGGCGGGGGCCGTG  
GA

: *TMPRSS2*, : *ERG*, +1: Transcription start, ctgcag: PstI

## asC-16

+1gtgctcgcttcggcagcacatataactaacattggaacgatcctgcagTGACATAGATGAGCACTGGGTAGACCCCGTCCTGGT  
AAACTCTTCATGCACTAACAAGTTGGTTGCCAGTGAGAGAAAAGGCGCACCCGGTGCTCCCAGGCGGGGGCCGTGGAGGGCAG  
GCGGACTA

: *TMPRSS2*, : *ERG*, +1: Transcription start, ctgcag: PstI

## asC-20

+1gtgctcgcttcggcagcacatataactaacattggaacgatcctgcagCCTATGACATAGATGAGCACTGGGTAGACCCCGTCC  
TGGTAACACTCTTCATGCACTAACAAGTTGGTTGCCAGTAGGCGGAGGGGTCTCCCAGGCGGGGGCCGTGGAGGGCAGGCGG  
ACTAGGAG

: *TMPRSS2*, : *ERG*, +1: Transcription start, ctgcag: PstI

## asC-25

+1gtgctcgcttcggcagcacatataactaacattggaacgatcctgcagCTCTTCCTATGACATAGATGAGCACTGGGTAGACCCCG  
TCCTGGTAACACTTCTCATGCACTAACAAGTTGGTTGCACCGGTGCTCCCAGGCGGGGGCCGTGGAGGGCAGGCGGACTAGGAGCCA  
GC

 : *TMPRSS2*,  : *ERG*, +1: Transcription start, ctgcag: PstI

#### asC-31

+1gtgctcgcttcggcagcacatataactaacattggaacgatcctgcagCTCATGCTCTTCCTATGACATAGATGAGCACTGGGT  
AGACCCCGTCCTGGTAACACTCTTCATGCACTAACAAGTTGCTCCCAAGCGGGGGCCGTGGAGGGCAGGCGGACTAGGAGCCCA  
GCTTTGGG

 : *TMPRSS2*,  : *ERG*, +1: Transcription start, ctgcag: PstI

#### asC-35

+1gtgctcgcttcggcagcacatataactaacattggaacgatcctgcagTGAGCTCATGCTCTTCCTATGACATAGATGAGCACT  
GGGTAGACCCCGTCCTGGTAACACTCTTCATGCACTAACCCAGGCGGGGGCCGTGGAGGGCAGGCGGACTAGGAGCCAGCTT  
TGGCGAGG

 : *TMPRSS2*,  : *ERG*, +1: Transcription start, ctgcag: PstI

#### asC-40

+1gtgctcgcttcggcagcacatataactaacattggaacgatcctgcagTACGCTGAGCTCATGCTCTTCCTATGACATAGATGA  
GCACTGGGTAGACCCCGTCCTGGTAACACTCTTCATGCACCGGGGGCCGTGGAGGGCAGGCGGACTAGGAGCCAGCTTTGGGG  
ACCCCGGG

 : *TMPRSS2*,  : *ERG*, +1: Transcription start, ctgcag: PstI

#### asC-45

+1gtgctcgcttcggcagcacatataactaacattggaacgatcctgcagTGTTATACGCTGAGCTCATGCTCTTCCTATGACATA  
GATGAGCACTGGGTAGACCCCGTCCTGGTAACACTCTTCGGCCGTGGAGGGCAGGCGGACTAGGAGCCAGCTTTGGGGACCCG  
GGGGGACT

 : *TMPRSS2*,  : *ERG*, +1: Transcription start, ctgcag: PstI

## asC-50

+1gtgctcgcttcggcagcacatataactaacattggaacgatcctgcagGCTAATGTTATACGCTGAGCTCATGCTGTTCCCTATGAC  
 ATAGATGAGCACTGGGTAGACCCCGTCTGGTAACACTTGGAGGGCAGGCGGACTAGGAGCCAGCTTTGGGGACCCCGGGGACTCTC  
 TT

: TMPRSS2, : ERG, +1: Transcription start, ctgcag: PstI

## asC-100

+1gtgctcgcttcggcagcacatataactaacattggaacgatcctgcagTGGTTGCTGCATGGAAAGGGGACTAAGTAGCCAGGTCA  
 TCAGAGCCCTTTGCTAATGTTATACGCTGAGCTCATGTTCACCAACTGGCTAGGGACTCGCAGGACCACCTGCCCAACCTCGCGA  
 TG

: TMPRSS2, : ERG, +1: Transcription start, ctgcag: PstI

## asD-2

+1gtgctcgcttcggcagcacatataactaacattggaacgatcctgcagGAGACAGAAGAAAGATGAAGGGATAAGTGTCCAGAA  
 TCCCTGGATCTGGGATGGAATAAAGGATCTGGATGGTAAGCACCGCGGAGGCGCCCTGCCCGGCTGCGCCAGCGCTCGACC  
 CTCGGGCG

: TMPRSS2, : ERG, +1: Transcription start, ctgcag: PstI

## asD-16

+1gtgctcgcttcggcagcacatataactaacattggaacgatcctgcagGCTGGTAGAGGGAAGAGACAGAAGAAAGATGAAGGGAT  
 AAGTGTCCAGAATCCCTGGATCTGGGATGGAATAAAGGCCCTGCCCGGCTGGCCCCAGCGCTCGACCCCTCGGGCGCACTCACCTGCC  
 GC

: TMPRSS2, : ERG, +1: Transcription start, ctgcag: PstI

## asD-20

+1gtgctcgcttcggcagcacatataactaacattggaacgatcctgcagAGAGGCTGGTAGAGGGAAGAGACAGAAGAAAGATGA  
AGGGATAAGTGTCCAGAATCCCTGGATCTGGGATGGAATTGCCCCGCTGGCCCCAGCGCTCGACCCCTCGGGCGCACTCACCTG  
CCGGGGGG

: *TMPRSS2*, : *ERG*, +1: Transcription start, ctgcag: PstI

#### asD-25

+1gtgctcgcttcggcagcacatataactaacattggaacgatcctgcagGAGAGAGAGGCTGGTAGAGGGAAGAGACAGAAGAAA  
GATGAAGGGATAAGTGTCCAGAATCCCTGGATCTGGGATGGCTGGCCCCAGCGCTCGACCCCTCGGGCGCACTCACCTGCCGCG  
CCGCGCTG

: *TMPRSS2*, : *ERG*, +1: Transcription start, ctgcag: PstI

#### asD-31

+1gtgctcgcttcggcagcacatataactaacattggaacgatcctgcagGACAGAGAGAGAGAGGCTGGTAGAGGGAAGAGACAG  
AAGAAAGATGAAGGGATAAGTGTCCAGAATCCCTGGATCCCCAGCGCTCGACCCCTCGGGCGCACTCACCTGCCGCGCCGCGCG  
TCCTCACA

: *TMPRSS2*, : *ERG*, +1: Transcription start, ctgcag: PstI

#### asD-35

+1gtgctcgcttcggcagcacatataactaacattggaacgatcctgcagGAGAGACAGAGAGAGAGAGGCTGGTAGAGGGAAGAGAC  
AGAAGAAAGATGAAGGGATAAGTGTCCAGAATCCCTGAGCGCTCGACCCCTCGGGCGCACTCACCTGCCGCGCCGCGCTCCTCACACC  
CG

: *TMPRSS2*, : *ERG*, +1: Transcription start, ctgcag: PstI

#### asD-40

+1gtgctcgcttcggcagcacatataactaacattggaacgatcctgcagCTAGAGAGAGACAGAGAGAGAGAGGCTGGTAGAGGGAA  
GAGACAGAAGAAAGATGAAGGGATAAGTGTCCAGAATTGACCCCTCGGGCGCACTCACCTGCCGCGCCGCGCTCCTCACACCCGCTT  
TC



 : *TMPRSS2*,  : *ERG*, +1: Transcription start, ctgcag: PstI

#### asD-45

+1gtgctcgcttcggcagcacatataactaacattggaacgatcctgcagATCACCTAGAGAGAGACAGAGAGAGAGAGGGCTGGTAGA  
GGGAAGAGACAGAAGAAAGATGAAGGGATAAGTGTCCCTCGGGCGCACTCACCTGCCGCGCCGCGCTCCTCACACCCGCTTTCACC  
TC

 : *TMPRSS2*,  : *ERG*, +1: Transcription start, ctgcag: PstI

#### asD-50

+1gtgctcgcttcggcagcacatataactaacattggaacgatcctgcagATGGAATCACCTAGAGAGAGACAGAGAGAGAGAGGGCTG  
GTAGAGGGAAGAGACAGAAGAAAGATGAAGGGATAAGGGCGCACTCACCTGCCGCGCCGCGCTCCTCACACCCGCTTTCACCTCCGG  
GC

 : *TMPRSS2*,  : *ERG*, +1: Transcription start, ctgcag: PstI

#### asD-100

+1gtgctcgcttcggcagcacatataactaacattggaacgatcctgcagAAGAAAAGTCACACGGTGGAGTGTGTTGGTGCCTGCTC  
TTGCCATGAGAGATGGAATCACCTAGAGAGAGACAGAGCGGGGCAGGGGGCATCGGCGGGTCCCAGGCGCCAGGTTCCTCCCTCCCCA  
GC

 : *TMPRSS2*,  : *ERG*, +1: Transcription start, ctgcag: PstI

#### asB-35-100/100

+1gtgctcgcttcggcagcacatataactaacattggaacgatcctgcagAGGGATTAAAGGAACTGGTGTGCACTGGCCTGAGCCTT  
GAAGAATGGGGTGTACTGGGTAAATCAAAATGGTGGGGAGCATTTCCAGATGGAGAAAAGTGCCTCACCTGCCGCGCTCCAGGCGGCG  
CTCCCCGCCCCCTCGCCCTCCGCCTCCGCCTCCGCCTCCTGCTTAGCTCGCGCCTACTCGGCCCCGGCCCCGCCCCCTGG

 : *TMPRSS2*,  : *ERG*, +1: Transcription start, ctgcag: PstI

#### asB-35-75/75

+1gtgctcgcttcggcagcacatataactaacattggaacgatcctgcagTGGCCTGAGCCTTGAAGAATGGGGTGTACTGGGTAAAT  
 CAAAATGGTGGGGAGCATTTCAGATGGAGAACTGCCTCACCTGCCGCGCTCCAGGCGGCGCTCCCCGCCCCCTCGCCCTCCGCCTC  
 CGCCTCCGCCTCCTGCTTAGCTCGC

: TMPRSS2, : ERG, +1: Transcription start, ctgcag: PstI

#### asB-35-50/50

+1gtgctcgcttcggcagcacatataactaacattggaacgatcctgcagGTACTGGGTAAATCAAAAATGGTGGGGAGCATTTCCTCA  
 GATGGAGAAACTGCCTCACCTGCCGCGCTCCAGGCGGCGCTCCCCGCCCCCTCGCCCTCCGCCTC

: TMPRSS2, : ERG, +1: Transcription start, ctgcag: PstI

#### asB-35-30/30

+1gtgctcgcttcggcagcacatataactaacattggaacgatcctgcagGTGGGGAGCATTTCAGATGGAGAACTGCCTCACCTG  
 CCGCGCTCCAGGCGGCGCTCCC

: TMPRSS2, : ERG, +1: Transcription start, ctgcag: PstI

#### asC-35-100/100

+1gtgctcgcttcggcagcacatataactaacattggaacgatcctgcagAGAGCCCTTTGCTAATGTTATACGCTGAGCTCATGCTC  
 TTCCTATGACATAGATGAGCACTGGGTAGACCCCGTCCTGGTAACACTCTTCATGCACTAACCCCAGGCGGGGGCCGTGGAGGGCAG  
 GCGGACTAGGAGCCAGCTTTGGGGACCCCGGGGACTCTCTTCCACCAACTGGCTAGGGACTCGCAGGACCACCT

: TMPRSS2, : ERG, +1: Transcription start, ctgcag: PstI

#### asC-35-75/75

+1gtgctcgcttcggcagcacatataactaacattggaacgatcctgcagTGAGCTCATGCTCTTCCTATGACATAGATGAGCACTGG  
 GTAGACCCCGTCCTGGTAACACTCTTCATGCACTAACCCCAGGCGGGGGCCGTGGAGGGCAGGCGGACTAGGAGCCAGCTTTGGGGGA  
 CCCCAGGGGACTCTCTTCCACCAAC

 : *TMPRSS2*,  : *ERG*, +1: Transcription start, ctgcag: PstI

#### asC-35-50/50

+1gtgctcgcttcggcagcacatataactaacattggaacgatcctgcagAGATGAGCACTGGGTAGACCCCGTCCTGGTAACACTCT  
TCATGCACTAACCCCAGGCGGGGGCCGTGGAGGGCAGGCGGACTAGGAGCCAGCTTTGGGGA

 : *TMPRSS2*,  : *ERG*, +1: Transcription start, ctgcag: PstI

#### asC-35-30/30

+1gtgctcgcttcggcagcacatataactaacattggaacgatcctgcagCCGTCCTGGTAACACTCTTCATGCACTAACCCCAGGCG  
GGGGCCGTGGAGGGCAGGCGGA

 : *TMPRSS2*,  : *ERG*, +1: Transcription start, ctgcag: PstI

#### asD-35-100/100

+1gtgctcgcttcggcagcacatataactaacattggaacgatcctgcagGCCATGAGAGATGGAATCACCTAGAGAGAGACAGAGAG  
AGAGAGGCTGGTAGAGGGAAGAGACAGAAGAAAGATGAAGGGATAAGTGTCCAGAATCCCTGAGCGCTCGACCCTCGGGCGCACTCA  
CCTGCCGCGCCGCGCTCCTCACACCCGCTTTCACCTCCGGGCGGGCAGGGGGCATCGGCGGGTCCCAGGCGCCC

 : *TMPRSS2*,  : *ERG*, +1: Transcription start, ctgcag: PstI

#### asD-35-75/75

+1gtgctcgcttcggcagcacatataactaacattggaacgatcctgcagGAGAGACAGAGAGAGAGAGGCTGGTAGAGGGAAGAGAC  
AGAAGAAAGATGAAGGGATAAGTGTCCAGAATCCCTGAGCGCTCGACCCTCGGGCGCACTCACCTGCCGCGCCGCGCTCCTCACACC  
CGCTTTCACCTCCGGGCGGGGAGG

 : *TMPRSS2*,  : *ERG*, +1: Transcription start, ctgcag: PstI

## asD-35-50/50

+1gtgctcgcttcgggcagcacatataactaacattggaacgatcctgcagAGAGGGAAGAGACAGAAGAAAGATGAAGGGATAAGTGT  
CCAGAATCCCTGAGCGCTCGACCCTCGGGCGCACTCACCTGCCGCGCCGCGCTCCTCACACC

: *TMPRSS2*, : *ERG*, +1: Transcription start, ctgcag: PstI

## asD-35-30/30

+1gtgctcgcttcgggcagcacatataactaacattggaacgatcctgcagAGATGAAGGGATAAGTGTCCAGAATCCCTGAGCGCTCG  
ACCCTCGGGCGCACTCACCTGC

: *TMPRSS2*, : *ERG*, +1: Transcription start, ctgcag: PstI
